# Supplementary material for: Development of a CRISPR/Cas9 System for Methylococcus capsulatus In Vivo Gene Editing
Source: PubMed Central journal article supplement (PMC6532038; doi:10.1128/aem.00340-19), 2019-05-16
Supplement: AEM.00340-19-s0001.pdf [file AEM.00340-19-s0001.pdf]

1 Supplemental Materials: Tapscott, *et al.*

2

3 Supplemental Figures

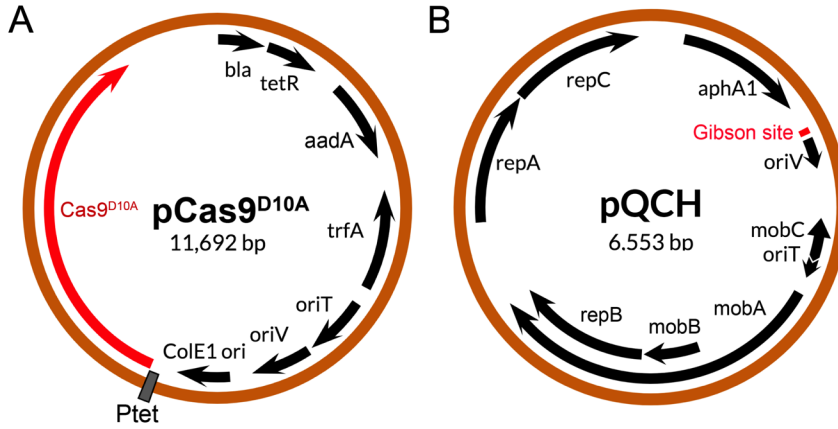

4

5 **Figure S1. Development of CRISPR/Cas9 genetic tools**

6 (A) Plasmid map of pCAH01::Cas9<sup>D10A</sup> (pCas9<sup>D10A</sup>). (B) Plasmid map of pQCH.

7

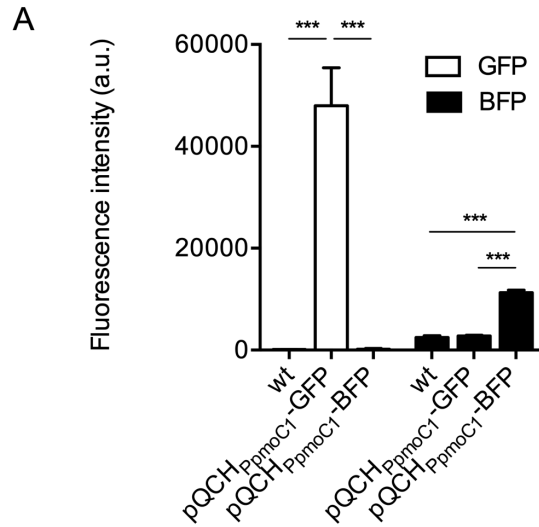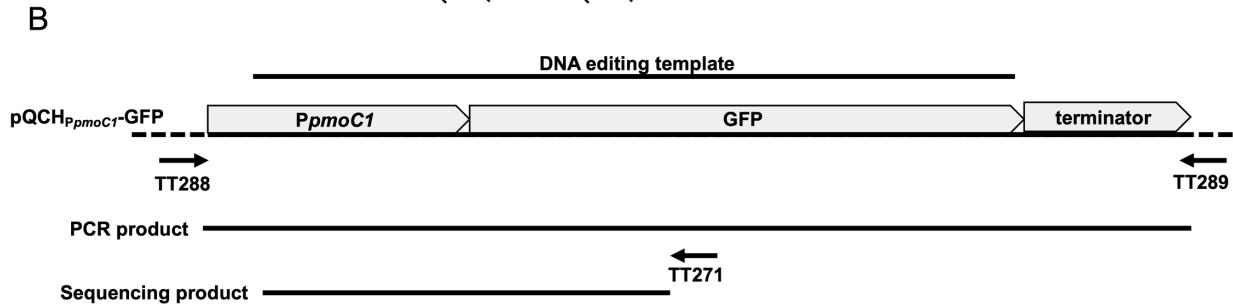

**Figure S2. GFP to BFP editing**

(A) Fluorescence intensity of *M. capsulatus* cells expressing pQCH::P<sub>pmoC1</sub>-GFP and pQCH::P<sub>pmoC1</sub>-BFP. Data depict mean arbitrary units (a.u.) ± S.D. from at least 3 unique CFUs (B) Schematic of pQCH::P<sub>pmoC1</sub>-GFP locus that was targeted for gene editing. DNA editing template spanned 1 kb. For verification of genomic edits, primers TT288 and TT289 were used for genomic cPCR amplification and primer TT271 was used for Sanger sequencing. \*\*\*  $p < 0.001$ , \*\*  $p < 0.01$ , \*  $p < 0.05$ , n.s. not significant.

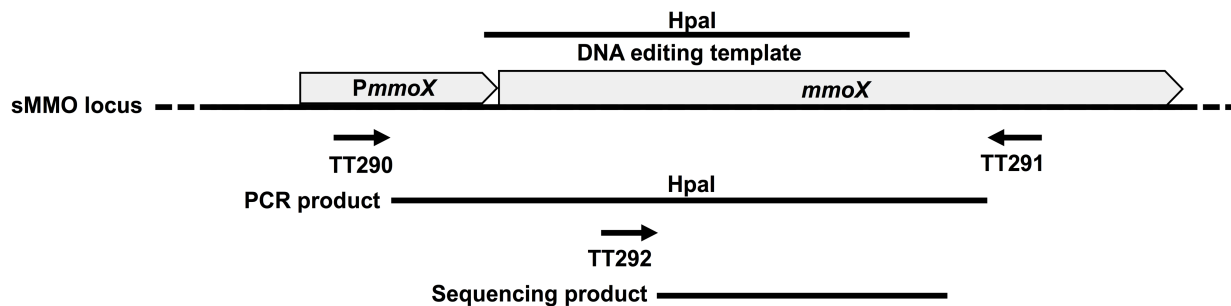

18

19 **Figure S3. sMMO *mmoX* editing**

20 Schematic of soluble methane monooxygenase (sMMO) hydroxylase component *mmoX*  
 21 that was targeted for gene editing. DNA editing template spanned 1 kb  
 22 of *mmoX* containing *HpaI* endonuclease recognition site and nonsense codon  
 23 substitution p.C151X. For verification of genomic edits, primers TT290 and TT291 were  
 24 used for genomic PCR amplification and primer TT292 was used for Sanger sequencing.

25 **Supplemental Tables**

26 **Table S1. Media composition**

| <b>Component</b>                                      | <b>NMS</b> | <b>Mating</b> |
|-------------------------------------------------------|------------|---------------|
| KNO <sub>3</sub>                                      | 1 g/L      | 1 g/L         |
| MgSO <sub>4</sub> x 7H <sub>2</sub> O                 | 0.2 g/L    | 0.2 g/L       |
| CaCl <sub>2</sub> x 2H <sub>2</sub> O                 | 0.02 g/L   | 0.02 g/L      |
| NaCl                                                  |            | 2 g/L         |
| Trace solution (1000x)                                | 1 ml/L     | 1 ml/L        |
| Nutrient Broth                                        |            | 1.2 g/L       |
| Agar                                                  | 15 g/L     | 15 g/L        |
| Phosphate solution (pH 6.8)                           | 50 m/L     | 50 m/L        |
| <b>Phosphate solution (pH 6.8)</b>                    | g/L        |               |
| KH <sub>2</sub> PO <sub>4</sub>                       | 5.44       |               |
| Na <sub>2</sub> HPO <sub>4</sub>                      | 5.68       |               |
| <b>Trace mineral solution (1000x)</b>                 | g/L        |               |
| Na <sub>2</sub> EDTA                                  | 5          |               |
| FeSO <sub>4</sub> x 7 H <sub>2</sub> O                | 2          |               |
| ZnSO <sub>4</sub> x7 H <sub>2</sub> O                 | 0.3        |               |
| MnCl <sub>2</sub> x 4 H <sub>2</sub> O                | 0.03       |               |
| CoCl <sub>2</sub> x 6 H <sub>2</sub> O                | 0.2        |               |
| CuSO <sub>4</sub> x 5 H <sub>2</sub> O                | 1.2        |               |
| Na <sub>2</sub> O <sub>4</sub> W x 2H <sub>2</sub> O  | 0.3        |               |
| NiCl <sub>2</sub> x 6 H <sub>2</sub> O                | 0.05       |               |
| Na <sub>2</sub> MoO <sub>4</sub> x 2 H <sub>2</sub> O | 0.05       |               |
| H <sub>3</sub> BO <sub>3</sub>                        | 0.03       |               |

27

28

**Table S2. Gene fragments**

| Name / Sequence                                                                                                                                                                                                                                                                                                                                                                                                                                                                                                                                                                                                                                                                                                                                                                                                                                                                                                                                                                                                                                                                                                                                                                                                                                                                                                                                                                                                                                                                                                                                                                                                       | Source     |
|-----------------------------------------------------------------------------------------------------------------------------------------------------------------------------------------------------------------------------------------------------------------------------------------------------------------------------------------------------------------------------------------------------------------------------------------------------------------------------------------------------------------------------------------------------------------------------------------------------------------------------------------------------------------------------------------------------------------------------------------------------------------------------------------------------------------------------------------------------------------------------------------------------------------------------------------------------------------------------------------------------------------------------------------------------------------------------------------------------------------------------------------------------------------------------------------------------------------------------------------------------------------------------------------------------------------------------------------------------------------------------------------------------------------------------------------------------------------------------------------------------------------------------------------------------------------------------------------------------------------------|------------|
| 29 gRNA-GFP                                                                                                                                                                                                                                                                                                                                                                                                                                                                                                                                                                                                                                                                                                                                                                                                                                                                                                                                                                                                                                                                                                                                                                                                                                                                                                                                                                                                                                                                                                                                                                                                           | IDT gBlock |
| 30 GAGGTT CAGGCGAAACCGCAGACTCAAGGGCGCTTGCTCCCGGAAAGATCGTATTAGTTTGCCTCGATCGGCGGTCCTT<br>31 GTGACAGGGAGATATTCCCGACGGATCCGGGGCATTTCGAGCGGAACCGCCCGCGTGGGAGTTTTTCCAGCGAGCATTCCG<br>32 AGAGTTTTTCAAGGCGGCTTCGAGGGGTATTCGGTAACGCCGCCGACATGATCTGTCCAGAATCTCCGCCGCTGTTCG<br>33 TAGAGCGCCGATGCAGGGTCGGCATCAATCATTCTTGGAGGAGACACGGAAAAGCATTGAACACCATGTTTTAGAGCTAG<br>34 AAATAGCAAGTTAAAATAAGGCTAGTCCGTTATCAACTTGAAAAAGTGGCACCAGTCCGGTGCTTTTTTTTGTCCGGGAAG<br>35 ATGCGTGATCTGATCC                                                                                                                                                                                                                                                                                                                                                                                                                                                                                                                                                                                                                                                                                                                                                                                                                                                                                                                                                                                                                                                                                                                                                |            |
| 36 gRNA-GFP & GFP <sup>BFP</sup> editing template                                                                                                                                                                                                                                                                                                                                                                                                                                                                                                                                                                                                                                                                                                                                                                                                                                                                                                                                                                                                                                                                                                                                                                                                                                                                                                                                                                                                                                                                                                                                                                     | PCR/Gibson |
| 37 GAGGTT CAGGCGAAACCGCAGACTCAAGGGCGCTTGCTCCCGGAAAGATCGTATTAGTTTGCCTCGATCGGCGGTCCTT<br>38 GTGACAGGGAGATATTCCCGACGGATCCGGGGCATTTCGAGCGGAACCGCCCGCGTGGGAGTTTTTCCAGCGAGCATTCCG<br>39 AGAGTTTTTCAAGGCGGCTTCGAGGGGTATTCGGTAACGCCGCCGACATGATCTGTCCAGAATCTCCGCCGCTGTTCG<br>40 TAGAGCGCCGATGCAGGGTCGGCATCAATCATTCTTGGAGGAGACACGGAAAAGCATTGAACACCATGTTTTAGAGCTAG<br>41 AAATAGCAAGTTAAAATAAGGCTAGTCCGTTATCAACTTGAAAAAGTGGCACCAGTCCGGTGCTTTTTTTTGTCCGGGAAG<br>42 ATGCGTGATCTGATCCTTCGGACCGACGGATTGGACCGACGGATTTTATGCAAGCATGTCGCTTTGACCAAGCCGGGATT<br>43 CCATGGAAGGGATGTCATCGGGAGAGTTATTTATGTCGTTGATTATAAGAACTACCCCTGCGTCAAAATGTCGAGAT<br>44 TTTTCTTGACAGTTTGGGGGAGGGTGATAGACTCCCTCCACCGATGGACCGGTACCGCCTCTGTTCGGGGTCCATGAAA<br>45 TGCCCGTTAGAGGCAGAACCGATAGGGAATTAGAGAAGCGGGCGTCGGCGCGAATGCGGGCCCTGTCAACCATCACTT<br>46 TAGGAGGAACAAACAATGAGCAAAGGAGAAGAACCTTTCACCTGGAGTTGTCCCAATTCTTGTGAATTAGATGGTGTATGT<br>47 TAATGGGCACAAATTTCTGTCCGTGGAGAGGGTGAAGGTGATGCTACAAACGGAAAACCTACCCCTTAAATTTATTTGCA<br>48 CTACTGGAACCTACCTGTTCCATGGCCAACACTTGTCACTACTCTGAGCCATGGGGTTCAATGCTTTTCCGTTATCCG<br>49 GATCACATGAAACGGCATGACTTTTCAAGAGTGCCATGCCGAAGGTTATGTACAGGAACGCACTATATCTTCAAAGA<br>50 TGACGGGACCTACAAGACGCGTCTGAAAGTCAAGTTTGAAGGTGATAACCTTGTTAATCGTATCGAGTTAAAAGGTATTG<br>51 ATTTTAAAGAAGATGGAACATCTCGGACACAACTCGAGTACAACCTTAACTCACACAATGTATACATCACGGCAGAC<br>52 AACAAAAGAATGGAATCAAAGCTAAGTTCAAATTCGCCACACGTTGAAGATGGTTCCGTTCAACTAGCAGACCATT<br>53 TCAACAAAATACTCCAATTGGCGATGGCCCTGTCTTTTACCAGACAACCATTACCTGTGACACAATCTGTCTTTTCGA<br>54 AAGATCCCAACGAAAAGCGTGACCACATGGTCTTCTTGAGTTTGTAACTGCTGCTGGGATTACACATGGCA<br>55                  |            |
| 56 gRNA- <i>mmoX</i>                                                                                                                                                                                                                                                                                                                                                                                                                                                                                                                                                                                                                                                                                                                                                                                                                                                                                                                                                                                                                                                                                                                                                                                                                                                                                                                                                                                                                                                                                                                                                                                                  | IDT gBlock |
| 57 GAGGTT CAGGCGAAACCGCAGACTCAAGGGCGCTTGCTCCCGGAAAGATCGTATTAGTTTGCCTCGATCGGCGGTCCTT<br>58 GTGACAGGGAGATATTCCCGACGGATCCGGGGCATTTCGAGCGGAACCGCCCGCGTGGGAGTTTTTCCAGCGAGCATTCCG<br>59 AGAGTTTTTCAAGGCGGCTTCGAGGGGTATTCGGTAACGCCGCCGACATGATCTGTCCAGAATCTCCGCCGCTGTTCG<br>60 TAGAGCGCCGATGCAGGGTCGGCATCAATCATTCTTGGAGGAGACACGATACGCCATCGGACATAAGTTTTAGAGCTAG<br>61 AAATAGCAAGTTAAAATAAGGCTAGTCCGTTATCAACTTGAAAAAGTGGCACCAGTCCGGTGCTTTTTTTTGTCCGGGAAG<br>62 ATGCGTGATCTGATCC<br>63                                                                                                                                                                                                                                                                                                                                                                                                                                                                                                                                                                                                                                                                                                                                                                                                                                                                                                                                                                                                                                                                                                                                           |            |
| 64 gRNA- <i>mmoX</i> & <i>mmoX</i> <sup>TAA</sup> editing template                                                                                                                                                                                                                                                                                                                                                                                                                                                                                                                                                                                                                                                                                                                                                                                                                                                                                                                                                                                                                                                                                                                                                                                                                                                                                                                                                                                                                                                                                                                                                    | IDT gBlock |
| 65 TCCAATTCGCCCTATAGTGAGAGGTT CAGGCGAAACCGCAGACTCAAGGGCGCTTGCTCCCGGAAAGATCGTATTAGTT<br>66 TGCTCGATCGGCGGTCCTTGTGACAGGGAGATATTCCCGACGGATCCGGGGCATTTCGAGCGGAACCGCCCGCGTGGGA<br>67 GTTTTTCCAGCGAGCATTTCGAGAGTTTTTCAAGGCGGCTTCGAGGGGTATTCGGTAACGCCGCCGACATGATCTGTCCC<br>68 AGAATCTCCCGCGCTGTTTCGTAGAGCGCCGATGCAGGGTCGGCATCAATCATTCTTGGAGGAGACACCGGCTATCTGGCC<br>69 CAGGTGTGTTTTAGAGCTAGAAAATAGCAAGTTAAAATAAGGCTAGTCCGTTATCAACTTGAAAAAGTGGCACCAGTCCG<br>70 TGCTTTTTTTGTCCGGGAAGATGCGTGATCTGATCCGTCATCGGGCATTTCATCATTCATAGAAATGTGTTACGGAGGAAAC<br>71 AAGTAATGGCACTTAGCACCACCAAGGCCGACGACGCGCTGGCTGCCAATCGGGCACCACCAGCGTGAATGCA<br>72 CAGGAAGTGCACCGTTGGCTCCAGAGCTTCAACTGGGATTTCAAGAACAACCGGACCAAGTACGCCACCAAGTACAAGAT<br>73 GCGGAACGAGACCAAGGAACAGTTCAAGCTGATCGCAAGGAATATGCGCGCATGGAGGCAGTCAAGGACGAAAGGCAGT<br>74 TCGGTAGCCTGCAGGATGCGTGACCCGCTCAACGCGGTGTTCCGCTTCATCCGAAGTGGACGAGACCATGAAAGTG<br>75 GTTTCGAACTTCTGGAAGTGGCGAATAACAACGCCATCGCCGCTACCGGGATGCTGTGGGATTCGCCACGCGCGGA<br>76 ACAGAAGAACGGCTATCTGGCCAGGTGTTTAAATGAAATCCGCCACACCCACCGTTAACCCTACGTCAACTACTACTTCG<br>77 CGAAGAACGGCCAGGACCCGGCCGGTCAACGATGCTCGCCGACCCGTTACCATCGGTCCGCTGTGGAAGGGCATGAAG<br>78 CGCGTGTTCGACGGCTTCAATTCGGCGACGCGGTGAAATGCTCCCTCAACCTGCAGCTGGTGGGTGAGGCTGCTT<br>79 CACCAATCCGCTGATCGTCGAGTGACCGAATGGGTGCGCCACGCGCATGAAATCACCCGACGGTGTTCCTGTGCA<br>80 TCGAGACCGAAGTCAAGTCAAGTCAAGTCAAGTCAAGTCAAGTCAAGTCAAGTCAAGTCAAGTCAAGTCAAGTCAAGTCAAG<br>81 TATCTCAACACGGACCTGAACAACGCCTTCTGGACCCAGCAGAACTTACGCGCGGTGTGGGCATGCTGTTCGAGTA<br>82 TGGCTCCAAGTTCAAGTTCGAGCCGTGGGTCAAGACGTGGAACCGCTGGGTGTACGAGGACTGGGGCGGCATCTGGTAGC<br>83 CGCTTATGTCTATTGC |            |
